# Supplementary material
Source: PubMed Central journal article supplement (PMC10020833)
Supplement: NIHMS1878069-supplement-Campochiaro_Ophthalmology_2015_Figure_1.pdf [file NIHMS1878069-supplement-Campochiaro_Ophthalmology_2015_Figure_1.pdf]

**Figure 1**

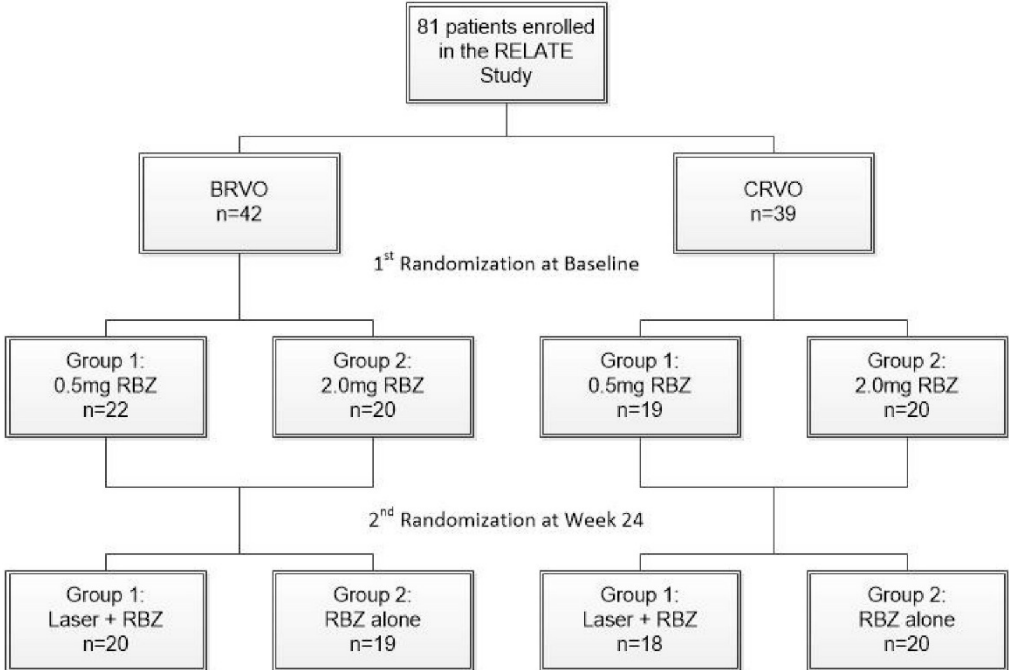

Schematic showing the first randomization at baseline and the second randomization at 24 weeks
