# Supplementary material
Source: PubMed Central journal article supplement (PMC10020833)
Supplement: NIHMS1878069-supplement-Campochiaro_Ophthalmology_2015_Table_6.pdf [file NIHMS1878069-supplement-Campochiaro_Ophthalmology_2015_Table_6.pdf]

**Table 6. Comparison of Visual Outcomes in Patients Treated with Laser + Ranibizumab versus Ranibizumab Alone with Last Observation Carried Forward**

|                                         | BRVO                  |                     |         | CRVO                  |                     |         |
|-----------------------------------------|-----------------------|---------------------|---------|-----------------------|---------------------|---------|
|                                         | RBZ + Laser<br>(n=20) | RBZ alone<br>(n=19) | p-value | RBZ + Laser<br>(n=18) | RBZ alone<br>(n=20) | p-value |
| <b>Week 48</b>                          |                       |                     |         |                       |                     |         |
| <b>Mean BCVA</b>                        |                       |                     |         |                       |                     |         |
| <b>Week 24, letter score</b>            | 69.9±3.1              | 60.8±2.9            | 0.04    | 63.1±3.3              | 61.7±4.4            | 0.92    |
| <b>Week 48</b>                          | 62.4±2.7              | 63.3±3.4            | 0.83    | 59.8±4.1              | 61.5±4.7            | 0.46    |
| <b>Change from baseline to week 48</b>  | -7.5±1.9              | 2.5±2.0             | <0.001  | -3.3±2.7              | -0.2±1.9            | 0.36    |
| <b>Week 96</b>                          |                       |                     |         |                       |                     |         |
| <b>Mean BCVA</b>                        |                       |                     |         |                       |                     |         |
| <b>Week 24, letter score</b>            | 69.9±3.1              | 60.8±2.9            | 0.04    | 63.1±3.3              | 61.7±4.4            | 0.92    |
| <b>Week 96</b>                          | 67.7±3.2              | 65.3±2.8            | 0.58    | 14.3±3.4              | 20.7±4.6            | 0.99    |
| <b>Change from baseline to week 96</b>  | -2.2±1.7              | 4.4±2.7             | 0.02    | 0.3±2.8               | -1.6±2.6            | 0.63    |
| <b>Week 144</b>                         |                       |                     |         |                       |                     |         |
| <b>Mean BCVA</b>                        |                       |                     |         |                       |                     |         |
| <b>Week 24, letter score</b>            | 69.9±3.1              | 60.8±2.9            | 0.04    | 63.1±3.3              | 61.7±4.4            | 0.92    |
| <b>Week 144</b>                         | 67.1±3.2              | 63.8±3.4            | 0.48    | 63.3±3.7              | 55.6±5.5            | 0.63    |
| <b>Change from baseline to week 144</b> | -2.8±1.9              | 2.9±2.8             | 0.12    | 0.17±3.6              | -6.1±2.9            | 0.18    |
