# Supplementary material
Source: PubMed Central journal article supplement (PMC10020833)
Supplement: NIHMS1878069-supplement-Campochiaro_Ophthalmology_2015_Table_8.pdf [file NIHMS1878069-supplement-Campochiaro_Ophthalmology_2015_Table_8.pdf]

**Table 8. Comparison of Anatomic Outcomes in Patients Treated with Laser + Ranibizumab versus Ranibizumab Alone with Last Observation Carried Forward**

|                                                                                                       | BRVO                  |                     |         | CRVO                  |                     |         |
|-------------------------------------------------------------------------------------------------------|-----------------------|---------------------|---------|-----------------------|---------------------|---------|
|                                                                                                       | RBZ + Laser<br>(n=20) | RBZ alone<br>(n=19) | p-value | RBZ + Laser<br>(n=18) | RBZ alone<br>(n=20) | p-value |
| <b>Week 48 Completers</b>                                                                             |                       |                     |         |                       |                     |         |
| <b>Mean CST</b>                                                                                       |                       |                     |         |                       |                     |         |
| <b>Week 24, <math>\mu\text{m}</math></b>                                                              | 311.4+18.7            | 347.7+31.6          | 0.82    | 323.0+19.6            | 309.8+32.5          | 0.16    |
| <b>Week 48</b>                                                                                        | 381.5+34.8            | 320.3+23.0          | 0.15    | 417.7+33.5            | 327.4+33.7          | 0.01    |
| <b>Change from baseline to week 48</b>                                                                | 70.0+27.9             | -27.0+38.7          | 0.05    | 94.7+27.4             | 4.7+38.3            | 0.03    |
| <b>Percentage of patients with CST<math>\leq</math>320 <math>\mu\text{m}</math> at 48 weeks, (n)</b>  | 45.0 (9.0)            | 63.2 (12.0)         | 0.13    | 38.9 (7.0)            | 70.0 (14.0)         | 0.11    |
| <b>Week 96 Completers</b>                                                                             |                       |                     |         |                       |                     |         |
| <b>Mean CST</b>                                                                                       |                       |                     |         |                       |                     |         |
| <b>Week 24, <math>\mu\text{m}</math></b>                                                              | 311.4+18.7            | 347.7+31.6          | 0.82    | 323.0+19.6            | 309.8+32.5          | 0.16    |
| <b>Week 96</b>                                                                                        | 332.5+26.9            | 308.3+29.2          | 0.27    | 342.8+22.6            | 338.1+51.2          | 0.25    |
| <b>Change from baseline to week 96</b>                                                                | 21.1+26.3             | -39.4+41.4          | 0.23    | 19.8+16.0             | 28.3+43.8           | 0.47    |
| <b>Percentage of patients with CST<math>\leq</math>320 <math>\mu\text{m}</math> at 96 weeks, (n)</b>  | 55.0 (11.0)           | 78.9 (15.0)         | 0.33    | 50.0 (9.0)            | 75.0 (15.0)         | 0.21    |
| <b>Week 144 Completers</b>                                                                            |                       |                     |         |                       |                     |         |
| <b>Mean CST</b>                                                                                       |                       |                     |         |                       |                     |         |
| <b>Week 24, <math>\mu\text{m}</math></b>                                                              | 311.4+18.7            | 347.7+31.6          | 0.82    | 323.0+19.6            | 309.8+32.5          | 0.16    |
| <b>Week 144</b>                                                                                       | 342.5+27.7            | 338.0+36.0          | 0.33    | 377.0+32.1            | 368.6+54.0          | 0.36    |
| <b>Change from baseline to week 144</b>                                                               | 31.2+24.9             | -9.7+46.1           | 0.44    | 50.8+32.7             | 58.8+53.3           | 0.85    |
| <b>Percentage of patients with CST<math>\leq</math>320 <math>\mu\text{m}</math> at 144 weeks, (n)</b> | 60.0 (12.0)           | 73.7 (14.0)         | 0.67    | 44.4 (8.0)            | 65.0 (13.0)         | 0.34    |
